# Supplementary material for: A Network Biology Approach to Discover the Molecular Biomarker Associated with Hepatocellular Carcinoma
Source: Biomed Res Int. 2014 May 14;2014:278956. doi: 10.1155/2014/278956 (PMC4053081; doi:10.1155/2014/278956)
Supplement: Supplementary file 1 — contains the identified survival related subnetworks. For each subnetworks, the seed node, the component genes, the number of nodes and the the number of edges are reported. Supplementary File 2: contains survival gene list selected by univariate cox proportionhazards model. The gene symbol,name,accession number and univariate cox p-value are reported. Supplementary File 3: contains the Gene Ontology categories selected by enrichment analysis of survival gene. For each category, the GO ID, name,FDR and number of total genes are reported. [file 278956.f1.zip]

Archive with 3 entries (3 files):
- Supplementary File 3.xls
- Supp1ementary File 1.xls
- Supplementary File 2.xls
