# Supplementary material for: A Network Biology Approach to Discover the Molecular Biomarker Associated with Hepatocellular Carcinoma
Source: Biomed Res Int. 2014 May 14;2014:278956. doi: 10.1155/2014/278956 (PMC4053081; doi:10.1155/2014/278956)
Supplement: Supplementary file 1 — contains the identified survival related subnetworks. For each subnetworks, the seed node, the component genes, the number of nodes and the the number of edges are reported. Supplementary File 2: contains survival gene list selected by univariate cox proportionhazards model. The gene symbol,name,accession number and univariate cox p-value are reported. Supplementary File 3: contains the Gene Ontology categories selected by enrichment analysis of survival gene. For each category, the GO ID, name,FDR and number of total genes are reported. [file 278956.f1.zip › Supp1ementary File 1.xls]

## Sheet: Sheet1
Supplementary File 1.Survival related subnetworks
Rank	Seed Gene	No.of nodes	No.of Edge	Multivariable Cox P-values	Component genes
1	CCR7	6	5	8.68666e-06	CCR7	XCL2	VCAN	CCL21	CCL19	FBLN2
2	HIST1H2BJ	7	6	1.01533e-05	HIST1H2BJ	LOX	DPT	BAT3	ELN	FBLN2	ASS1
3	PPIL2	10	9	1.61453e-05	PPIL2	BSG	MMP1	SLC16A1	TIMP1	CAV1	TNFRSF1B	CSNK2A2	GNAI2	MAPK3
4	CCR6	6	5	4.58805e-05	CCR6	CCL20	VCAN	FBLN2	CCL21	XCL1
5	ACAA2	8	7	9.64621e-05	ACAA2	SCP2	ACOX1	CAV1	TNFRSF1B	CSNK2A2	GNAI2	MAPK3
6	SLC12A2	12	12	1.19831e-05	SLC12A2	STK39	VAV1	PRKCQ	MAPK14	MAPK8	MARS	CSNK2A2	MAP3K7IP1	SPAG9	PTPN7	PML
7	SLC12A1	12	12	1.36914e-05	SLC12A1	STK39	VAV1	PRKCQ	MAPK14	MAPK8	MARS	CSNK2A2	MAP3K7IP1	SPAG9	PTPN7	PML
8	LOX	8	7	0.00013889	LOX	DPT	BAT3	IGFBP5	ELN	FBLN2	VCAN	ASS1
9	CCDC22	9	8	0.000432582	CCDC22	CPNE1	ACTB	FLII	RAB4A	PRKCI	MAPK3	SMAD2	SKI
10	TROVE2	9	8	0.00113812	TROVE2	TRIM21	YWHAZ	PDC	MARK2	PRKCI	MAPK8	TH	LIMK1
11	ACOX1	8	7	0.00964621	ACOX1	SCP2	ACAA2	CAV1	TNFRSF1B	CSNK2A2	GNAI2	MAPK3
Average number		8.63636	7.81818
