# Supplementary material for: A Network Biology Approach to Discover the Molecular Biomarker Associated with Hepatocellular Carcinoma
Source: Biomed Res Int. 2014 May 14;2014:278956. doi: 10.1155/2014/278956 (PMC4053081; doi:10.1155/2014/278956)
Supplement: Supplementary file 1 — contains the identified survival related subnetworks. For each subnetworks, the seed node, the component genes, the number of nodes and the the number of edges are reported. Supplementary File 2: contains survival gene list selected by univariate cox proportionhazards model. The gene symbol,name,accession number and univariate cox p-value are reported. Supplementary File 3: contains the Gene Ontology categories selected by enrichment analysis of survival gene. For each category, the GO ID, name,FDR and number of total genes are reported. [file 278956.f1.zip › Supplementary File 2.xls]

## Sheet: Sheet1
Supplementary Table 2.
Survival gene list selected by univariate cox proportionhazards model
Symbol	Accession	Univariate cox p-value	Name
HLA-DOA	NM_002119	7.79e-05	major histocompatibility complex, class II, DO alpha
MYL9	NM_006097	0.0001245	myosin, light chain 9, regulatory
ESRRG	NM_001438	0.000208	estrogen-related receptor gamma
MMP1	NM_002421	0.0002751	matrix metallopeptidase 1 (interstitial collagenase)
PDC	NM_002597	0.0003685	phosducin
SEPW1	NM_003009	0.0004397	selenoprotein W, 1
FBLN2	NM_001004019	0.0004887	fibulin 2
HOXB1	NM_002144	0.0008226	homeobox B1
CCT6B	NM_006584	0.0008354	chaperonin containing TCP1, subunit 6B (zeta 2)
CD5	NM_014207	0.0009192	CD5 molecule
PRODH	NM_016335	0.0011815	proline dehydrogenase (oxidase) 1
WIPI1	NM_017983	0.001247	WD repeat domain, phosphoinositide interacting 1
TNK2	NM_001010938	0.0014958	tyrosine kinase, non-receptor, 2
MARK2	NM_001039468	0.0018004	MAP/microtubule affinity-regulating kinase 2
UNC13B	NM_006377	0.0019214	unc-13 homolog B (C. elegans)
SPOCK2	NM_014767	0.0020889	sparc/osteonectin, cwcv and kazal-like domains proteoglycan (testican) 2
B4GALNT1	NM_001478	0.002206	beta-1,4-N-acetyl-galactosaminyl transferase 1
PSG11	NM_002785	0.0024149	pregnancy specific beta-1-glycoprotein 11
DBN1	NM_004395	0.0025577	drebrin 1
RPL18	NM_000979	0.002576	ribosomal protein L18
CTH	NM_001902	0.0026282	cystathionase (cystathionine gamma-lyase)
TNFRSF1B	NM_001066	0.002669	tumor necrosis factor receptor superfamily, member 1B
CADM1	NM_014333	0.0028047	cell adhesion molecule 1
M6PRBP1	NM_005817	0.0030862	mannose-6-phosphate receptor binding protein 1
LTB	NM_002341	0.0034393	lymphotoxin beta (TNF superfamily, member 3)
NFE2L3	NM_004289	0.0037635	nuclear factor (erythroid-derived 2)-like 3
HTN3	NM_000200	0.0038215	histatin 3
FH	NM_000143	0.0040091	fumarate hydratase
ECHS1	NM_004092	0.0041709	enoyl Coenzyme A hydratase, short chain, 1, mitochondrial
BCHE	NM_000055	0.0045677	butyrylcholinesterase
ALOX5AP	NM_001629	0.0045962	arachidonate 5-lipoxygenase-activating protein
CCL19	NM_006274	0.0047646	chemokine (C-C motif) ligand 19
CCL21	NM_002989	0.0048353	chemokine (C-C motif) ligand 21
ATP5O	NM_001697	0.0050033	ATP synthase, H+ transporting, mitochondrial F1 complex, O subunit (oligomycin sensitivity conferring protein)
HSPE1	NM_002157	0.0050215	heat shock 10kDa protein 1 (chaperonin 10)
XCL1	NM_002995	0.0050942	chemokine (C motif) ligand 1
MPV17	NM_002437	0.0051087	MpV17 mitochondrial inner membrane protein
LDHB	NM_002300	0.0051413	lactate dehydrogenase B
SERPINB3	NM_006919	0.0054982	serpin peptidase inhibitor, clade B (ovalbumin), member 3
COX7A2	NM_001865	0.0058294	cytochrome c oxidase subunit VIIa polypeptide 2 (liver)
PSD4	NM_012455	0.0059161	pleckstrin and Sec7 domain containing 4
IL3RA	NM_002183	0.0059366	interleukin 3 receptor, alpha (low affinity)
IL16	NM_004513	0.0059549	interleukin 16 (lymphocyte chemoattractant factor)
WSB1	NM_015626	0.0060196	WD repeat and SOCS box-containing 1
GREM1	NM_013372	0.006276	gremlin 1, cysteine knot superfamily, homolog (Xenopus laevis)
NCF2	NM_000433	0.0063053	neutrophil cytosolic factor 2 (65kDa, chronic granulomatous disease, autosomal 2)
TNFSF4	NM_003326	0.0063201	tumor necrosis factor (ligand) superfamily, member 4 (tax-transcriptionally activated glycoprotein 1, 34kDa)
ATP5G2	NM_001002031	0.0063339	ATP synthase, H+ transporting, mitochondrial F0 complex, subunit C2 (subunit 9)
PRKCI	NM_002740	0.0064491	protein kinase C, iota
HUWE1	NM_031407	0.0068346	HECT, UBA and WWE domain containing 1
MAGEC1	XM_001126506	0.0069673	melanoma antigen family C, 1
GNRH2	NM_001501	0.0070283	gonadotropin-releasing hormone 2
SKAP2	NM_003930	0.0071782	src kinase associated phosphoprotein 2
JAK3	NM_000215	0.0074333	Janus kinase 3 (a protein tyrosine kinase, leukocyte)
CSF3	NM_000759	0.0075383	colony stimulating factor 3 (granulocyte)
EGR1	NM_001964	0.007545	early growth response 1
GPAA1	NM_003801	0.0077806	glycosylphosphatidylinositol anchor attachment protein 1 homolog (yeast)
RBM5	NM_005778	0.0078275	RNA binding motif protein 5
GRM4	NM_000841	0.0078488	glutamate receptor, metabotropic 4
THBS4	NM_003248	0.0079653	thrombospondin 4
LAMB3	NM_000228	0.0081148	laminin, beta 3
GHRHR	NM_000823	0.0081266	growth hormone releasing hormone receptor
PER2	NM_003894	0.0081334	period homolog 2 (Drosophila)
SMAD2	NM_001003652	0.0081385	SMAD family member 2
RANGAP1	NM_002883	0.0085598	Ran GTPase activating protein 1
SKI	NM_003036	0.0086469	v-ski sarcoma viral oncogene homolog (avian)
RBL2	NM_005611	0.0087004	retinoblastoma-like 2 (p130)
TTC1	NM_003314	0.0087742	tetratricopeptide repeat domain 1
SEMA3A	NM_006080	0.0089208	sema domain, immunoglobulin domain (Ig), short basic domain, secreted, (semaphorin) 3A
PEX6	NM_000287	0.0091929	peroxisomal biogenesis factor 6
CREBL2	NM_001310	0.0091954	cAMP responsive element binding protein-like 2
ARSD	NM_001669	0.0092114	arylsulfatase D
ADCYAP1R1	NM_001118	0.0092885	adenylate cyclase activating polypeptide 1 (pituitary) receptor type I
SFRP4	NM_003014	0.0093098	secreted frizzled-related protein 4
SSBP1	NM_003143	0.0097267	single-stranded DNA binding protein 1
FAM13A1	NM_001015045	0.0097488	family with sequence similarity 13, member A1
SLC26A4	NM_000441	0.0098346	solute carrier family 26, member 4
CPNE1	NM_003915	0.0098498	copine I
EN2	NM_001427	0.0098518	engrailed homeobox 2
RBM38	NM_017495	0.0099907	RNA binding motif protein 38
FLII	NM_002018	0.0102312	flightless I homolog (Drosophila)
IL12A	NM_000882	0.0102634	interleukin 12A (natural killer cell stimulatory factor 1, cytotoxic lymphocyte maturation factor 1, p35)
CLCN1	NM_000083	0.0102785	chloride channel 1, skeletal muscle (Thomsen disease, autosomal dominant)
CENTB1	NM_014716	0.0104042	centaurin, beta 1
ZNF132	NM_003433	0.0106664	zinc finger protein 132
BCL7B	NM_001707	0.01069	B-cell CLL/lymphoma 7B
SGCE	NM_003919	0.0107832	sarcoglycan, epsilon
ABCD2	NM_005164	0.0116756	ATP-binding cassette, sub-family D (ALD), member 2
TFF3	NM_003226	0.0120286	trefoil factor 3 (intestinal)
CAPN2	NM_001748	0.0120321	calpain 2, (m/II) large subunit
WNT10B	NM_003394	0.0120456	wingless-type MMTV integration site family, member 10B
HSPH1	NM_006644	0.012072	heat shock 105kDa/110kDa protein 1
DOC2A	NM_003586	0.0122745	double C2-like domains, alpha
SLC39A8	NM_022154	0.0123246	solute carrier family 39 (zinc transporter), member 8
RFC1	NM_002913	0.0123456	replication factor C (activator 1) 1, 145kDa
ARG2	NM_001172	0.0125763	arginase, type II
ZNF148	NM_021964	0.0126426	zinc finger protein 148
IGFBP5	NM_000599	0.0126882	insulin-like growth factor binding protein 5
PDXDC1	XM_001125924	0.0128673	pyridoxal-dependent decarboxylase domain containing 1
ITK	NM_005546	0.0129229	IL2-inducible T-cell kinase
GRIA2	NM_000826	0.0130443	glutamate receptor, ionotropic, AMPA 2
PSMD1	NM_002807	0.013134	proteasome (prosome, macropain) 26S subunit, non-ATPase, 1
CST1	NM_001898	0.0132787	cystatin SN
GJA5	NM_005266	0.0134945	gap junction protein, alpha 5, 40kDa
RASL10A	NM_001007279	0.0136145	RAS-like, family 10, member A
ACTB	NM_001101	0.0139495	actin, beta
HIST1H2BH	NM_003524	0.0141983	histone cluster 1, H2bh
SLA	NM_001045556	0.0142782	Src-like-adaptor
ACVR2A	NM_001616	0.0144227	activin A receptor, type IIA
CTNNA2	NM_004389	0.0145284	catenin (cadherin-associated protein), alpha 2
BTN2A2	NM_006995	0.0146248	butyrophilin, subfamily 2, member A2
GK	NM_000167	0.0150278	glycerol kinase
NFKBIL1	NM_005007	0.0150328	nuclear factor of kappa light polypeptide gene enhancer in B-cells inhibitor-like 1
STRA13	NM_144998	0.0153235	stimulated by retinoic acid 13 homolog (mouse)
RAB3GAP1	NM_012233	0.0154277	RAB3 GTPase activating protein subunit 1 (catalytic)
PLAC8	NM_016619	0.0154589	placenta-specific 8
PIM1	NM_002648	0.0157937	pim-1 oncogene
DGUOK	NM_080916	0.016	deoxyguanosine kinase
CD27	NM_001242	0.0160357	CD27 molecule
SPN	NM_001030288	0.0160608	sialophorin (leukosialin, CD43)
KCNJ8	NM_004982	0.0162704	potassium inwardly-rectifying channel, subfamily J, member 8
SYNE2	NM_182912	0.0164283	spectrin repeat containing, nuclear envelope 2
GATA3	NM_001002295	0.0165342	GATA binding protein 3
PRKCQ	NM_006257	0.0167177	protein kinase C, theta
ACTB	NM_001101	0.016722	actin, beta
PCYT2	NM_002861	0.0167605	phosphate cytidylyltransferase 2, ethanolamine
LGALS9	NM_002308	0.0167718	lectin, galactoside-binding, soluble, 9 (galectin 9)
CYP17A1	NM_000102	0.0171731	cytochrome P450, family 17, subfamily A, polypeptide 1
MAP3K7IP1	NM_006116	0.0175986	mitogen-activated protein kinase kinase kinase 7 interacting protein 1
PEX12	NM_000286	0.0179935	peroxisomal biogenesis factor 12
GTPBP1	NM_004286	0.0180034	GTP binding protein 1
SCGB1D2	NM_006551	0.0181285	secretoglobin, family 1D, member 2
AEBP1	NM_001129	0.0184334	AE binding protein 1
NEFH	NM_021076	0.0187052	neurofilament, heavy polypeptide 200kDa
PAFAH1B1	NM_000430	0.0192692	platelet-activating factor acetylhydrolase, isoform Ib, alpha subunit 45kDa
MS4A1	NM_021950	0.0194178	membrane-spanning 4-domains, subfamily A, member 1
MBOAT2	XM_001129292	0.0195454	membrane bound O-acyltransferase domain containing 2
ANTXR1	NM_018153	0.0197385	anthrax toxin receptor 1
HCCS	NM_005333	0.0197831	holocytochrome c synthase (cytochrome c heme-lyase)
USP52	NM_014871	0.0199294	ubiquitin specific peptidase 52
SYCP1	NM_003176	0.0199399	synaptonemal complex protein 1
VCAN	NM_004385	0.0199925	versican
FABP1	NM_001443	0.0200295	fatty acid binding protein 1, liver
HGD	XM_001123365	0.020383	homogentisate 1,2-dioxygenase (homogentisate oxidase)
KLRB1	NM_002258	0.0205262	killer cell lectin-like receptor subfamily B, member 1
SULT2B1	NM_004605	0.0205604	sulfotransferase family, cytosolic, 2B, member 1
IFNAR2	NM_000874	0.0206003	interferon (alpha, beta and omega) receptor 2
CIAO1	NM_004804	0.0206501	cytosolic iron-sulfur protein assembly 1 homolog (S. cerevisiae)
CYP2F1	NM_000774	0.020818	cytochrome P450, family 2, subfamily F, polypeptide 1
ATP2A3	NM_005173	0.020842	ATPase, Ca++ transporting, ubiquitous
CTGF	NM_001901	0.0210283	connective tissue growth factor
ACTB	NM_001101	0.0213002	actin, beta
MARS	NM_004990	0.0215466	methionyl-tRNA synthetase
SEMA4F	NM_004263	0.0216594	sema domain, immunoglobulin domain (Ig), transmembrane domain (TM) and short cytoplasmic domain, (semaphorin) 4F
PBX2	NM_002586	0.0217474	pre-B-cell leukemia homeobox 2
CUTL2	NM_015267	0.0218136	cut-like 2 (Drosophila)
LPGAT1	NM_014873	0.0223455	lysophosphatidylglycerol acyltransferase 1
COX6A2	XM_001127854	0.0223636	cytochrome c oxidase subunit VIa polypeptide 2
CXCR3	NM_001504	0.0223749	chemokine (C-X-C motif) receptor 3
PRKX	NM_005044	0.0224556	protein kinase, X-linked
MMP13	NM_002427	0.0225655	matrix metallopeptidase 13 (collagenase 3)
AHSA1	NM_012111	0.0231027	AHA1, activator of heat shock 90kDa protein ATPase homolog 1 (yeast)
CD3E	NM_000733	0.023103	CD3e molecule, epsilon (CD3-TCR complex)
USP20	NM_001008563	0.0232873	ubiquitin specific peptidase 20
DOCK4	NM_014705	0.0233296	dedicator of cytokinesis 4
ARHGEF10	NM_014629	0.023374	Rho guanine nucleotide exchange factor (GEF) 10
GPR31	NM_005299	0.0235758	G protein-coupled receptor 31
GPR12	NM_005288	0.0237723	G protein-coupled receptor 12
ZP2	NM_003460	0.0239386	zona pellucida glycoprotein 2 (sperm receptor)
VPS45	NM_007259	0.024027	vacuolar protein sorting 45 homolog (S. cerevisiae)
MAPK8	NM_002750	0.0240516	mitogen-activated protein kinase 8
NQO2	NM_000904	0.0241662	NAD(P)H dehydrogenase, quinone 2
BID	NM_001196	0.0241995	BH3 interacting domain death agonist
SYK	NM_003177	0.0243643	spleen tyrosine kinase
COPB2	NM_004766	0.0243647	coatomer protein complex, subunit beta 2 (beta prime)
NDUFA5	NM_005000	0.0246312	NADH dehydrogenase (ubiquinone) 1 alpha subcomplex, 5, 13kDa
TAT	NM_000353	0.0247968	tyrosine aminotransferase
CD3D	NM_000732	0.0248175	CD3d molecule, delta (CD3-TCR complex)
PPYR1	XM_001129329	0.0250714	pancreatic polypeptide receptor 1
BTG3	NM_006806	0.0250757	BTG family, member 3
FXYD3	NM_005971	0.0251687	FXYD domain containing ion transport regulator 3
PTPRM	NM_002845	0.0252486	protein tyrosine phosphatase, receptor type, M
RBM3	NM_001017431	0.0255982	RNA binding motif (RNP1, RRM) protein 3
LY6D	NM_003695	0.025839	lymphocyte antigen 6 complex, locus D
DCXR	NM_016286	0.0260226	dicarbonyl/L-xylulose reductase
PDE3B	NM_000922	0.026056	phosphodiesterase 3B, cGMP-inhibited
ACAA2	NM_006111	0.026822	acetyl-Coenzyme A acyltransferase 2 (mitochondrial 3-oxoacyl-Coenzyme A thiolase)
SLC17A1	NM_005074	0.0268577	solute carrier family 17 (sodium phosphate), member 1
UBE2S	NM_014501	0.026876	ubiquitin-conjugating enzyme E2S
DYNC1LI2	NM_006141	0.0269201	dynein, cytoplasmic 1, light intermediate chain 2
ASNA1	NM_004317	0.0271281	arsA arsenite transporter, ATP-binding, homolog 1 (bacterial)
NTRK3	NM_001007156	0.0278207	neurotrophic tyrosine kinase, receptor, type 3
LIMK2	NM_001031801	0.0278907	LIM domain kinase 2
RUNX1	NM_001001890	0.0279215	runt-related transcription factor 1 (acute myeloid leukemia 1; aml1 oncogene)
MPI	NM_002435	0.0280924	mannose phosphate isomerase
Septin 6	NM_015129	0.0281784	septin 6
MBNL1	NM_021038	0.0289232	muscleblind-like (Drosophila)
PSG3	NM_021016	0.029147	pregnancy specific beta-1-glycoprotein 3
PDGFRB	NM_002609	0.0297607	platelet-derived growth factor receptor, beta polypeptide
FILIP1L	NM_001042459	0.0298678	filamin A interacting protein 1-like
DPT	NM_001937	0.0301324	dermatopontin
NUDT3	NM_006703	0.030174	nudix (nucleoside diphosphate linked moiety X)-type motif 3
FCER1A	NM_002001	0.0302743	Fc fragment of IgE, high affinity I, receptor for; alpha polypeptide
ARPC4	NM_001024959	0.0304304	actin related protein 2/3 complex, subunit 4, 20kDa
ATP2B4	NM_001001396	0.0306068	ATPase, Ca++ transporting, plasma membrane 4
MAL	NM_002371	0.0306432	mal, T-cell differentiation protein
CTCF	NM_006565	0.0307875	CCCTC-binding factor (zinc finger protein)
PXMP2	XM_001126107	0.0308937	peroxisomal membrane protein 2, 22kDa
DRD2	NM_000795	0.0310418	dopamine receptor D2
NPAS2	NM_002518	0.0311618	neuronal PAS domain protein 2
L1CAM	NM_000425	0.0311797	L1 cell adhesion molecule
P2RY6	NM_004154	0.0315194	pyrimidinergic receptor P2Y, G-protein coupled, 6
CSRP3	NM_003476	0.0315672	cysteine and glycine-rich protein 3 (cardiac LIM protein)
IFNA8	NM_002170	0.0317708	interferon, alpha 8
SRGN	NM_002727	0.0319474	serglycin
ARSE	NM_000047	0.0319899	arylsulfatase E (chondrodysplasia punctata 1)
BCAM	NM_001013257	0.0320806	basal cell adhesion molecule (Lutheran blood group)
GNAI2	NM_002070	0.0321578	guanine nucleotide binding protein (G protein), alpha inhibiting activity polypeptide 2
AAMP	NM_001087	0.0322151	angio-associated, migratory cell protein
ALOX15	XM_001131480	0.0328179	arachidonate 15-lipoxygenase
ARHGDIB	NM_001175	0.0329121	Rho GDP dissociation inhibitor (GDI) beta
MUTYH	NM_001048171	0.033201	mutY homolog (E. coli)
MAPK3	NM_001040056	0.0333681	mitogen-activated protein kinase 3
FOXJ1	NM_001454	0.0336412	forkhead box J1
ADIPOR2	NM_024551	0.0336843	adiponectin receptor 2
ATP6V1A	NM_001690	0.0339586	ATPase, H+ transporting, lysosomal 70kDa, V1 subunit A
PSG1	NM_006905	0.0340011	pregnancy specific beta-1-glycoprotein 1
RPL13A	NM_012423	0.0340078	ribosomal protein L13a
PML	XM_001132060	0.0340128	promyelocytic leukemia
OPRK1	NM_000912	0.0342655	opioid receptor, kappa 1
CD300C	NM_006678	0.0342754	CD300c molecule
BTC	NM_001729	0.0343393	betacellulin
CSNK2A2	NM_001896	0.0345466	casein kinase 2, alpha prime polypeptide
MMP10	NM_002425	0.0346123	matrix metallopeptidase 10 (stromelysin 2)
MYBL2	NM_002466	0.0347241	v-myb myeloblastosis viral oncogene homolog (avian)-like 2
CHRNB3	NM_000749	0.0347862	cholinergic receptor, nicotinic, beta 3
COL5A1	NM_000093	0.0349227	collagen, type V, alpha 1
ARHGEF5	NM_005435	0.0352346	Rho guanine nucleotide exchange factor (GEF) 5
ARID3A	NM_005224	0.0353216	AT rich interactive domain 3A (BRIGHT-like)
LZTR1	NM_006767	0.0355038	leucine-zipper-like transcription regulator 1
HMGN4	NM_006353	0.0357489	high mobility group nucleosomal binding domain 4
MLXIP	XM_001127740	0.036089	MLX interacting protein
ITM2C	NM_001012514	0.0361947	integral membrane protein 2C
CCND3	NM_001760	0.0362074	cyclin D3
MCAT	NM_014507	0.0364275	malonyl CoA:ACP acyltransferase (mitochondrial)
PSMD3	NM_002809	0.0365524	proteasome (prosome, macropain) 26S subunit, non-ATPase, 3
TH	NM_000360	0.0366523	tyrosine hydroxylase
HRK	NM_003806	0.0366538	harakiri, BCL2 interacting protein (contains only BH3 domain)
KIAA0859	NM_001007239	0.0366873	KIAA0859
TGIF2	NM_021809	0.0371263	TGFB-induced factor homeobox 2
MARCKSL1	NM_023009	0.0371374	MARCKS-like 1
PPP1R15A	NM_014330	0.0371517	protein phosphatase 1, regulatory (inhibitor) subunit 15A
SLURP1	NM_020427	0.0372007	secreted LY6/PLAUR domain containing 1
DDX6	NM_004397	0.0377255	DEAD (Asp-Glu-Ala-Asp) box polypeptide 6
MRPL48	NM_001030046	0.0380224	mitochondrial ribosomal protein L48
SRY	NM_003140	0.0380894	sex determining region Y
GPR171	NM_013308	0.0383153	G protein-coupled receptor 171
GRIA3	NM_181894	0.0384029	glutamate receptor, ionotrophic, AMPA 3
CMKLR1	NM_004072	0.0384227	chemokine-like receptor 1
BIN1	NM_004305	0.038923	bridging integrator 1
CKAP4	NM_006825	0.038954	cytoskeleton-associated protein 4
RAD51	NM_002875	0.0390401	RAD51 homolog (RecA homolog, E. coli) (S. cerevisiae)
BNIP3	NM_004052	0.0390898	BCL2/adenovirus E1B 19kDa interacting protein 3
LILRB2	NM_001080978	0.0393307	leukocyte immunoglobulin-like receptor, subfamily B (with TM and ITIM domains), member 2
LIMK1	NM_002314	0.0393329	LIM domain kinase 1
MPHOSPH1	NM_016195	0.0394266	M-phase phosphoprotein 1
ITPK1	NM_014216	0.0394277	inositol 1,3,4-triphosphate 5/6 kinase
GTF2H2	NM_001515	0.0394995	general transcription factor IIH, polypeptide 2, 44kDa
KIAA0355	NM_014686	0.0395128	KIAA0355
PTPN7	NM_002832	0.0397066	protein tyrosine phosphatase, non-receptor type 7
SLC9A3R1	NM_004252	0.04048	solute carrier family 9 (sodium/hydrogen exchanger), member 3 regulator 1
MCFD2	NM_139279	0.0404849	multiple coagulation factor deficiency 2
NR3C2	NM_000901	0.0405053	nuclear receptor subfamily 3, group C, member 2
SNX10	NM_013322	0.0411542	sorting nexin 10
ALDH6A1	NM_005589	0.0411921	aldehyde dehydrogenase 6 family, member A1
FGFR2	NM_000141	0.0414737	fibroblast growth factor receptor 2 (bacteria-expressed kinase, keratinocyte growth factor receptor, craniofacial dysostosis 1, Crouzon syndrome, Pfeiffer syndrome, Jackson-Weiss syndrome)
MR1	NM_001531	0.0418678	major histocompatibility complex, class I-related
DDEF2	NM_003887	0.0419717	development and differentiation enhancing factor 2
SV2B	NM_014848	0.0420863	synaptic vesicle glycoprotein 2B
HRC	NM_002152	0.0421084	histidine rich calcium binding protein
JAG1	NM_000214	0.0422232	jagged 1 (Alagille syndrome)
PIN1	NM_006221	0.0423966	protein (peptidylprolyl cis/trans isomerase) NIMA-interacting 1
TFDP1	NM_007111	0.0425309	transcription factor Dp-1
SERPINE1	NM_000602	0.0426461	serpin peptidase inhibitor, clade E (nexin, plasminogen activator inhibitor type 1), member 1
GNAZ	NM_002073	0.0427664	guanine nucleotide binding protein (G protein), alpha z polypeptide
CEBPA	NM_004364	0.0430013	CCAAT/enhancer binding protein (C/EBP), alpha
SPAG9	NM_172345	0.043009	sperm associated antigen 9
SKAP1	NM_001075099	0.043022	src kinase associated phosphoprotein 1
IGSF6	NM_005849	0.0430424	immunoglobulin superfamily, member 6
SAC3D1	NM_013299	0.043098	SAC3 domain containing 1
MYCN	NM_005378	0.0432999	v-myc myelocytomatosis viral related oncogene, neuroblastoma derived (avian)
SALL2	NM_005407	0.0433141	sal-like 2 (Drosophila)
ST3GAL2	NM_006927	0.0433905	ST3 beta-galactoside alpha-2,3-sialyltransferase 2
ADAMTS2	NM_014244	0.0435055	ADAM metallopeptidase with thrombospondin type 1 motif, 2
PSMD14	NM_005805	0.0435623	proteasome (prosome, macropain) 26S subunit, non-ATPase, 14
MEIS2	NM_020149	0.0437664	Meis homeobox 2
MPDZ	NM_003829	0.0437774	multiple PDZ domain protein
GULP1	NM_016315	0.0439003	GULP, engulfment adaptor PTB domain containing 1
GUCY2D	NM_000180	0.0439318	guanylate cyclase 2D, membrane (retina-specific)
RHD	NM_016124	0.0441065	Rh blood group, D antigen
CRHR1	XM_001128344	0.044388	corticotropin releasing hormone receptor 1
UGP2	NM_001001521	0.0444975	UDP-glucose pyrophosphorylase 2
SART3	NM_014706	0.0447618	squamous cell carcinoma antigen recognized by T cells 3
LAMP1	NM_005561	0.0449282	lysosomal-associated membrane protein 1
PLK2	NM_006622	0.0451088	polo-like kinase 2 (Drosophila)
CD40LG	NM_000074	0.0453282	CD40 ligand (TNF superfamily, member 5, hyper-IgM syndrome)
FHL2	NM_001039492	0.0454504	four and a half LIM domains 2
KLF1	NM_006563	0.045466	Kruppel-like factor 1 (erythroid)
DBT	NM_001918	0.0455955	dihydrolipoamide branched chain transacylase E2
PDE6G	NM_002602	0.0457071	phosphodiesterase 6G, cGMP-specific, rod, gamma
GRP	NM_001012512	0.0458568	gastrin-releasing peptide
BAG5	NM_001015048	0.0458624	BCL2-associated athanogene 5
KRT13	NM_002274	0.0461386	keratin 13
NR1D2	XM_001130839	0.0461586	nuclear receptor subfamily 1, group D, member 2
TNFAIP8	NM_001077654	0.0464085	tumor necrosis factor, alpha-induced protein 8
KCNJ3	NM_002239	0.0464468	potassium inwardly-rectifying channel, subfamily J, member 3
GALC	NM_000153	0.046503	galactosylceramidase
ITGB5	XM_001129224	0.0465394	integrin, beta 5
ADORA2A	NM_000675	0.0467972	adenosine A2a receptor
PAX5	NM_016734	0.0469365	paired box gene 5 (B-cell lineage specific activator)
ELN	NM_000501	0.046985	elastin (supravalvular aortic stenosis, Williams-Beuren syndrome)
INPP1	NM_002194	0.0470339	inositol polyphosphate-1-phosphatase
NAGLU	NM_000263	0.0470778	N-acetylglucosaminidase, alpha- (Sanfilippo disease IIIB)
ELK4	NM_001973	0.0471129	ELK4, ETS-domain protein (SRF accessory protein 1)
P2RY2	NM_002564	0.0476281	purinergic receptor P2Y, G-protein coupled, 2
SDHA	NM_004168	0.047761	succinate dehydrogenase complex, subunit A, flavoprotein (Fp)
BTG2	NM_006763	0.0483586	BTG family, member 2
ACSL1	NM_001995	0.0484734	acyl-CoA synthetase long-chain family member 1
MAEA	NM_001017405	0.0485164	macrophage erythroblast attacher
TEC	NM_003215	0.0485642	tec protein tyrosine kinase
G6PD	NM_000402	0.0487681	glucose-6-phosphate dehydrogenase
HK1	NM_000188	0.0490571	hexokinase 1
ERBB4	NM_001042599	0.04916	v-erb-a erythroblastic leukemia viral oncogene homolog 4 (avian)
PAH	NM_000277	0.0497606	phenylalanine hydroxylase
CYP11B1	NM_000497	0.0497918	cytochrome P450, family 11, subfamily B, polypeptide 1
BBOX1	NM_003986	0.0498651	butyrobetaine (gamma), 2-oxoglutarate dioxygenase (gamma-butyrobetaine hydroxylase) 1
