# Supplementary material for: A Network Biology Approach to Discover the Molecular Biomarker Associated with Hepatocellular Carcinoma
Source: Biomed Res Int. 2014 May 14;2014:278956. doi: 10.1155/2014/278956 (PMC4053081; doi:10.1155/2014/278956)
Supplement: Supplementary file 1 — contains the identified survival related subnetworks. For each subnetworks, the seed node, the component genes, the number of nodes and the the number of edges are reported. Supplementary File 2: contains survival gene list selected by univariate cox proportionhazards model. The gene symbol,name,accession number and univariate cox p-value are reported. Supplementary File 3: contains the Gene Ontology categories selected by enrichment analysis of survival gene. For each category, the GO ID, name,FDR and number of total genes are reported. [file 278956.f1.zip › Supplementary File 3.xls]

## Sheet: Sheet1
Supplementary Table 3.
Enrichment Analysis of survival gene in Gene Ontology categories
Cellular Component
ID	Name	Source	FDR	Number of total genes
GO:0005102	receptor binding		0.01509	48
GO:0032403	protein complex binding		0.0404	23
Biological Process
ID	Name	Source	FDR	Number of total genes
GO:0043067	regulation of programmed cell death		1.405e-05	60
GO:0060548	negative regulation of cell death		3.223e-05	40
GO:0042981	regulation of apoptotic process		3.223e-05	57
GO:2000145	regulation of cell motility		7.278e-05	30
GO:0050863	regulation of T cell activation		9.256e-05	20
GO:0046634	regulation of alpha-beta T cell activation		9.708e-05	11
GO:0043069	negative regulation of programmed cell death		0.0001004	37
GO:0051050	positive regulation of transport		0.0001004	33
GO:0051270	regulation of cellular component movement		0.0001004	31
GO:0030097	hemopoiesis		0.0001004	35
GO:0050867	positive regulation of cell activation		0.0001022	20
GO:0044093	positive regulation of molecular function		0.0001022	51
GO:0048534	hematopoietic or lymphoid organ development		0.0001058	36
GO:0030334	regulation of cell migration		0.0001058	28
GO:0051049	regulation of transport		0.0001058	53
GO:0010557	positive regulation of macromolecule biosynthetic process		0.0001192	55
GO:0046649	lymphocyte activation		0.0001368	29
GO:0042110	T cell activation		0.0001414	24
GO:0043066	negative regulation of apoptotic process		0.0001603	35
GO:0014070	response to organic cyclic compound		0.0001603	42
GO:0002696	positive regulation of leukocyte activation		0.0001623	19
GO:0008285	negative regulation of cell proliferation		0.0001623	31
GO:0002520	immune system development		0.0001703	36
GO:0001816	cytokine production		0.0001703	27
GO:0040012	regulation of locomotion		0.0001703	32
GO:1901700	response to oxygen-containing compound		0.0001703	53
GO:0019395	fatty acid oxidation		0.0001703	15
GO:0050865	regulation of cell activation		0.0001703	24
GO:0050870	positive regulation of T cell activation		0.0001703	16
GO:0002694	regulation of leukocyte activation		0.0001717	23
GO:0001775	cell activation		0.0001743	38
GO:0001817	regulation of cytokine production		0.0001767	25
GO:0043085	positive regulation of catalytic activity		0.0001767	44
GO:0016477	cell migration		0.0001767	48
GO:0006955	immune response		0.0001821	50
GO:0034440	lipid oxidation		0.0001854	15
GO:0046631	alpha-beta T cell activation		0.0001854	12
GO:0048870	cell motility		0.0001928	50
GO:0051674	localization of cell		0.0001928	50
GO:0051249	regulation of lymphocyte activation		0.0002501	21
GO:0045321	leukocyte activation		0.0002511	31
GO:0010562	positive regulation of phosphorus metabolic process		0.0002804	34
GO:0045937	positive regulation of phosphate metabolic process		0.0002804	34
GO:0033993	response to lipid		0.0003149	40
GO:0030258	lipid modification		0.0003149	18
GO:0048584	positive regulation of response to stimulus		0.0003149	51
GO:0051247	positive regulation of protein metabolic process		0.0003576	41
GO:0070661	leukocyte proliferation		0.0003592	17
GO:0042098	T cell proliferation		0.0004505	14
GO:0051251	positive regulation of lymphocyte activation		0.0005027	17
GO:0042102	positive regulation of T cell proliferation		0.0005352	10
GO:0002682	regulation of immune system process		0.0007838	41
GO:0016054	organic acid catabolic process		0.0008083	19
GO:0046395	carboxylic acid catabolic process		0.0008083	19
GO:0046651	lymphocyte proliferation		0.0008424	16
GO:0030217	T cell differentiation		0.0008823	15
GO:0030098	lymphocyte differentiation		0.0008823	18
GO:0031399	regulation of protein modification process		0.0008823	45
GO:0032943	mononuclear cell proliferation		0.0008823	16
GO:0042330	taxis		0.0008823	35
GO:0042129	regulation of T cell proliferation		0.0009354	12
GO:0032880	regulation of protein localization		0.0009622	25
GO:0097285	cell-type specific apoptotic process		0.0009879	21
GO:0030335	positive regulation of cell migration		0.0009879	18
GO:0006635	fatty acid beta-oxidation		0.001049	12
GO:0051130	positive regulation of cellular component organization		0.001059	31
GO:0002684	positive regulation of immune system process		0.00119	29
GO:2000147	positive regulation of cell motility		0.001209	18
GO:0070663	regulation of leukocyte proliferation		0.001232	14
GO:0046635	positive regulation of alpha-beta T cell activation		0.001444	8
GO:0050671	positive regulation of lymphocyte proliferation		0.001512	11
GO:0044282	small molecule catabolic process		0.001512	21
GO:0044712	single-organism catabolic process		0.001512	21
GO:0031401	positive regulation of protein modification process		0.001512	34
GO:0032270	positive regulation of cellular protein metabolic process		0.001512	37
GO:0055114	oxidation-reduction process		0.001512	42
GO:0032946	positive regulation of mononuclear cell proliferation		0.001575	11
GO:0051272	positive regulation of cellular component movement		0.001583	18
GO:0002521	leukocyte differentiation		0.001717	22
GO:0009636	response to toxic substance		0.00179	18
GO:0008284	positive regulation of cell proliferation		0.00184	33
GO:0070665	positive regulation of leukocyte proliferation		0.001944	11
GO:0050708	regulation of protein secretion		0.002116	13
GO:0009725	response to hormone stimulus		0.00213	42
GO:0042327	positive regulation of phosphorylation		0.002501	29
GO:0045935	positive regulation of nucleobase-containing compound metabolic process		0.002848	49
GO:0072329	monocarboxylic acid catabolic process		0.002855	13
GO:0023056	positive regulation of signaling		0.003054	39
GO:0050670	regulation of lymphocyte proliferation		0.003413	13
GO:0071495	cellular response to endogenous stimulus		0.003453	38
GO:0010647	positive regulation of cell communication		0.003453	39
GO:0010638	positive regulation of organelle organization		0.003469	18
GO:0032944	regulation of mononuclear cell proliferation		0.003491	13
GO:0001934	positive regulation of protein phosphorylation		0.003702	28
GO:0009306	protein secretion		0.003749	16
GO:0006461	protein complex assembly		0.003837	42
GO:0070201	regulation of establishment of protein localization		0.003988	21
GO:0070271	protein complex biogenesis		0.004057	42
GO:0051223	regulation of protein transport		0.004057	20
GO:0032101	regulation of response to external stimulus		0.004181	23
GO:0006935	chemotaxis		0.004594	32
GO:0060326	cell chemotaxis		0.004665	13
GO:0009062	fatty acid catabolic process		0.004665	12
GO:0009117	nucleotide metabolic process		0.004681	44
GO:0051173	positive regulation of nitrogen compound metabolic process		0.004933	49
GO:0050900	leukocyte migration		0.004933	17
GO:0021700	developmental maturation		0.005311	25
GO:0006753	nucleoside phosphate metabolic process		0.005368	44
GO:0071822	protein complex subunit organization		0.005554	45
GO:0007610	behavior		0.005722	37
GO:0050920	regulation of chemotaxis		0.005784	11
GO:0006468	protein phosphorylation		0.006005	47
GO:0032615	interleukin-12 production		0.006424	7
GO:0006082	organic acid metabolic process		0.006519	44
GO:0055086	nucleobase-containing small molecule metabolic process		0.007497	45
GO:0009967	positive regulation of signal transduction		0.007497	36
GO:0006979	response to oxidative stress		0.007675	23
GO:0040017	positive regulation of locomotion		0.007692	19
GO:0070372	regulation of ERK1 and ERK2 cascade		0.007777	11
GO:0002250	adaptive immune response		0.007783	15
GO:0044255	cellular lipid metabolic process		0.007783	40
GO:0002408	myeloid dendritic cell chemotaxis		0.007783	3
GO:0048520	positive regulation of behavior		0.007783	10
GO:0009611	response to wounding		0.008544	44
GO:0044057	regulation of system process		0.008674	27
GO:0045597	positive regulation of cell differentiation		0.008725	26
GO:0043436	oxoacid metabolic process		0.008827	43
GO:0050921	positive regulation of chemotaxis		0.008901	9
GO:0019752	carboxylic acid metabolic process		0.009723	40
GO:0070997	neuron death		0.009767	15
GO:0048545	response to steroid hormone stimulus		0.01031	23
GO:0042089	cytokine biosynthetic process		0.01073	10
GO:0014812	muscle cell migration		0.01079	7
GO:2000514	regulation of CD4-positive, alpha-beta T cell activation		0.0115	6
GO:0030595	leukocyte chemotaxis		0.01188	11
GO:0006631	fatty acid metabolic process		0.01311	22
GO:0048260	positive regulation of receptor-mediated endocytosis		0.01323	6
GO:0051094	positive regulation of developmental process		0.01359	33
GO:0042107	cytokine metabolic process		0.01373	10
GO:0045580	regulation of T cell differentiation		0.01374	9
GO:0035710	CD4-positive, alpha-beta T cell activation		0.01468	7
GO:0060341	regulation of cellular localization		0.01468	31
GO:0048878	chemical homeostasis		0.01487	39
GO:0007200	phospholipase C-activating G-protein coupled receptor signaling pathway		0.01524	8
GO:0033043	regulation of organelle organization		0.01598	29
GO:0045595	regulation of cell differentiation		0.01617	45
GO:0048666	neuron development		0.01624	41
GO:0051047	positive regulation of secretion		0.01646	16
GO:0006811	ion transport		0.01667	45
GO:0018108	peptidyl-tyrosine phosphorylation		0.01744	14
GO:0032753	positive regulation of interleukin-4 production		0.01744	4
GO:0051046	regulation of secretion		0.01851	24
GO:0051345	positive regulation of hydrolase activity		0.01853	23
GO:0050795	regulation of behavior		0.01864	14
GO:0002822	regulation of adaptive immune response based on somatic recombination of immune receptors built from immunoglobulin superfamily domains		0.01864	9
GO:0050868	negative regulation of T cell activation		0.0187	8
GO:1901615	organic hydroxy compound metabolic process		0.01907	23
GO:0018212	peptidyl-tyrosine modification		0.01907	14
GO:0042035	regulation of cytokine biosynthetic process		0.01965	9
GO:0070371	ERK1 and ERK2 cascade		0.02007	11
GO:0010628	positive regulation of gene expression		0.02063	43
GO:0071222	cellular response to lipopolysaccharide		0.02063	10
GO:0050878	regulation of body fluid levels		0.02064	26
GO:0071216	cellular response to biotic stimulus		0.02079	11
GO:0045058	T cell selection		0.02106	5
GO:0071353	cellular response to interleukin-4		0.02106	5
GO:0006570	tyrosine metabolic process		0.02179	4
GO:0007155	cell adhesion		0.0224	37
GO:0055078	sodium ion homeostasis		0.02253	6
GO:1901565	organonitrogen compound catabolic process		0.02322	36
GO:0019220	regulation of phosphate metabolic process		0.02356	46
GO:0032103	positive regulation of response to external stimulus		0.0242	12
GO:0006163	purine nucleotide metabolic process		0.0242	35
GO:0022610	biological adhesion		0.0242	37
GO:0014909	smooth muscle cell migration		0.02493	6
GO:0055080	cation homeostasis		0.02511	24
GO:0042692	muscle cell differentiation		0.02511	24
GO:0048259	regulation of receptor-mediated endocytosis		0.02559	7
GO:0046641	positive regulation of alpha-beta T cell proliferation		0.02718	4
GO:0045944	positive regulation of transcription from RNA polymerase II promoter		0.02718	31
GO:0071219	cellular response to molecule of bacterial origin		0.02718	10
GO:0051174	regulation of phosphorus metabolic process		0.02718	46
GO:0042108	positive regulation of cytokine biosynthetic process		0.0276	7
GO:0042060	wound healing		0.02764	28
GO:0007417	central nervous system development		0.02862	35
GO:0050801	ion homeostasis		0.02961	32
GO:0032655	regulation of interleukin-12 production		0.03028	6
GO:0006952	defense response		0.03078	45
GO:0032787	monocarboxylic acid metabolic process		0.03082	27
GO:0002460	adaptive immune response based on somatic recombination of immune receptors built from immunoglobulin superfamily domains		0.03089	13
GO:0010627	regulation of intracellular protein kinase cascade		0.03089	30
GO:0007188	adenylate cyclase-modulating G-protein coupled receptor signaling pathway		0.03089	10
GO:0072521	purine-containing compound metabolic process		0.03089	36
GO:0002819	regulation of adaptive immune response		0.03127	9
GO:0032609	interferon-gamma production		0.03533	8
GO:0009612	response to mechanical stimulus		0.03779	13
GO:0051254	positive regulation of RNA metabolic process		0.03779	41
GO:0006968	cellular defense response		0.0378	7
GO:0032872	regulation of stress-activated MAPK cascade		0.03851	12
GO:0051222	positive regulation of protein transport		0.03876	13
GO:0002688	regulation of leukocyte chemotaxis		0.04084	7
GO:0030182	neuron differentiation		0.04084	45
GO:0090023	positive regulation of neutrophil chemotaxis		0.04093	4
GO:0035588	G-protein coupled purinergic receptor signaling pathway		0.04112	5
GO:0070302	regulation of stress-activated protein kinase signaling cascade		0.04112	12
GO:0009607	response to biotic stimulus		0.04208	34
GO:0042325	regulation of phosphorylation		0.04208	34
GO:0032963	collagen metabolic process		0.04334	7
GO:1901698	response to nitrogen compound		0.04375	33
GO:0051707	response to other organism		0.04558	33
GO:0008544	epidermis development		0.04558	24
GO:0002703	regulation of leukocyte mediated immunity		0.04558	9
GO:0032320	positive regulation of Ras GTPase activity		0.04558	9
GO:0032633	interleukin-4 production		0.04575	5
GO:0070670	response to interleukin-4		0.04575	5
GO:0050776	regulation of immune response		0.04847	25
GO:0055065	metal ion homeostasis		0.04847	20
Molecular Function
ID	Name	Source	FDR	Number of total genes
GO:0005887	integral to plasma membrane		0.0003921	51
GO:0031226	intrinsic to plasma membrane		0.0003921	52
GO:0044421	extracellular region part		0.002527	45
GO:0031012	extracellular matrix		0.004869	23
GO:0009986	cell surface		0.01496	25
GO:0009897	external side of plasma membrane		0.03683	14
GO:0030425	dendrite		0.04579	21
